# Supplementary material
Source: PubMed Central journal article supplement (PMC2878396)
Supplement: NIHMS192086-supplement-1.pdf [file NIHMS192086-supplement-1.pdf]

## Supplementary Figure 1. PCR verification of *dpy-13* deletion

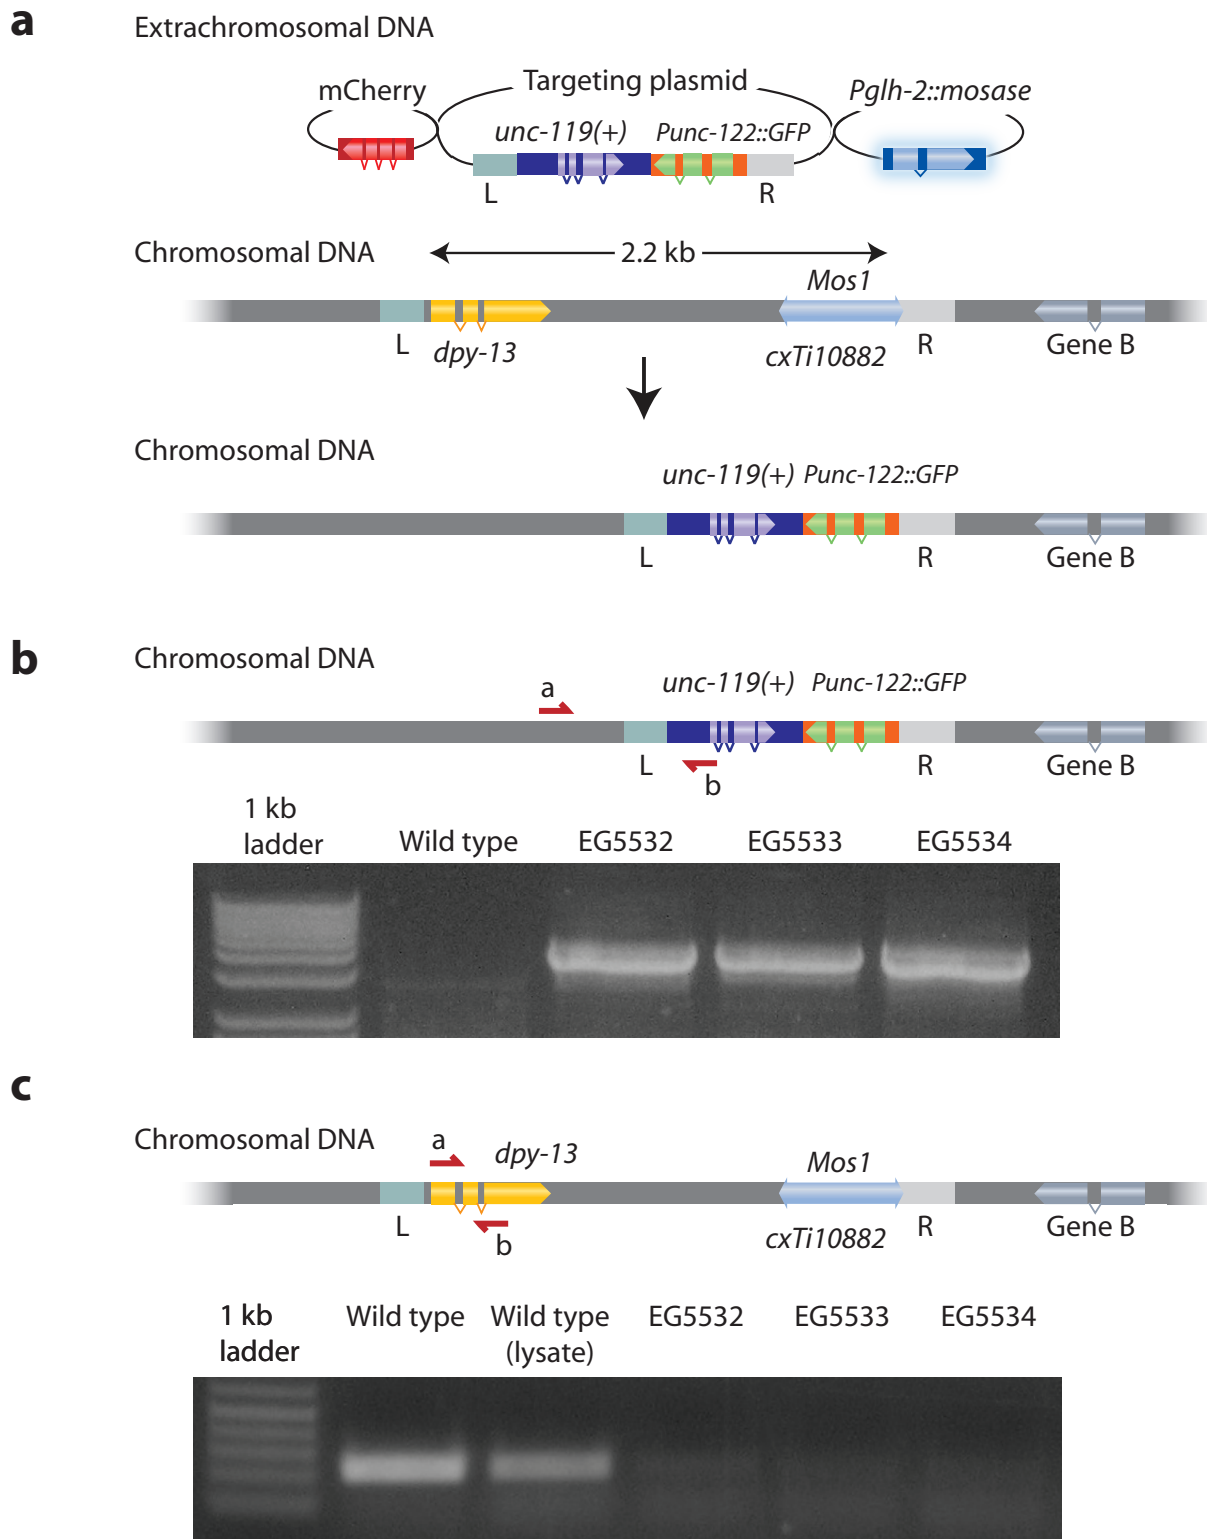

### Supplementary Figure 1: PCR verification of *dpy-13* deletion.

(a) Schematic of targeting construct to delete a 2.2 kb genomic fragment adjacent to *cxTi10882* including *dpy-13*. The *Mos1* allele was crossed into the *unc-119(ed3)* background (not shown). Three independent deletion strains were generated: EG5532, EG5533 and EG5534. (b) PCR verification of deletions. Oligos annealing outside the displaced targeting homology and inside the *cb-unc-119(+)* were used to amplify across the junction. PCR products were subsequently sequenced to verify correct deletion junctions. (c) PCR verification of deletions. Oligos were used to amplify a 245 bp fragment from *dpy-13*. The fragment could be detected from high quality wild type genomic DNA ("wild-type") and single worm lysates from wild type ("wild type lysate") but not from any of the deletion mutants.

## Supplementary Figure 2. *Mos1* distribution in the genome

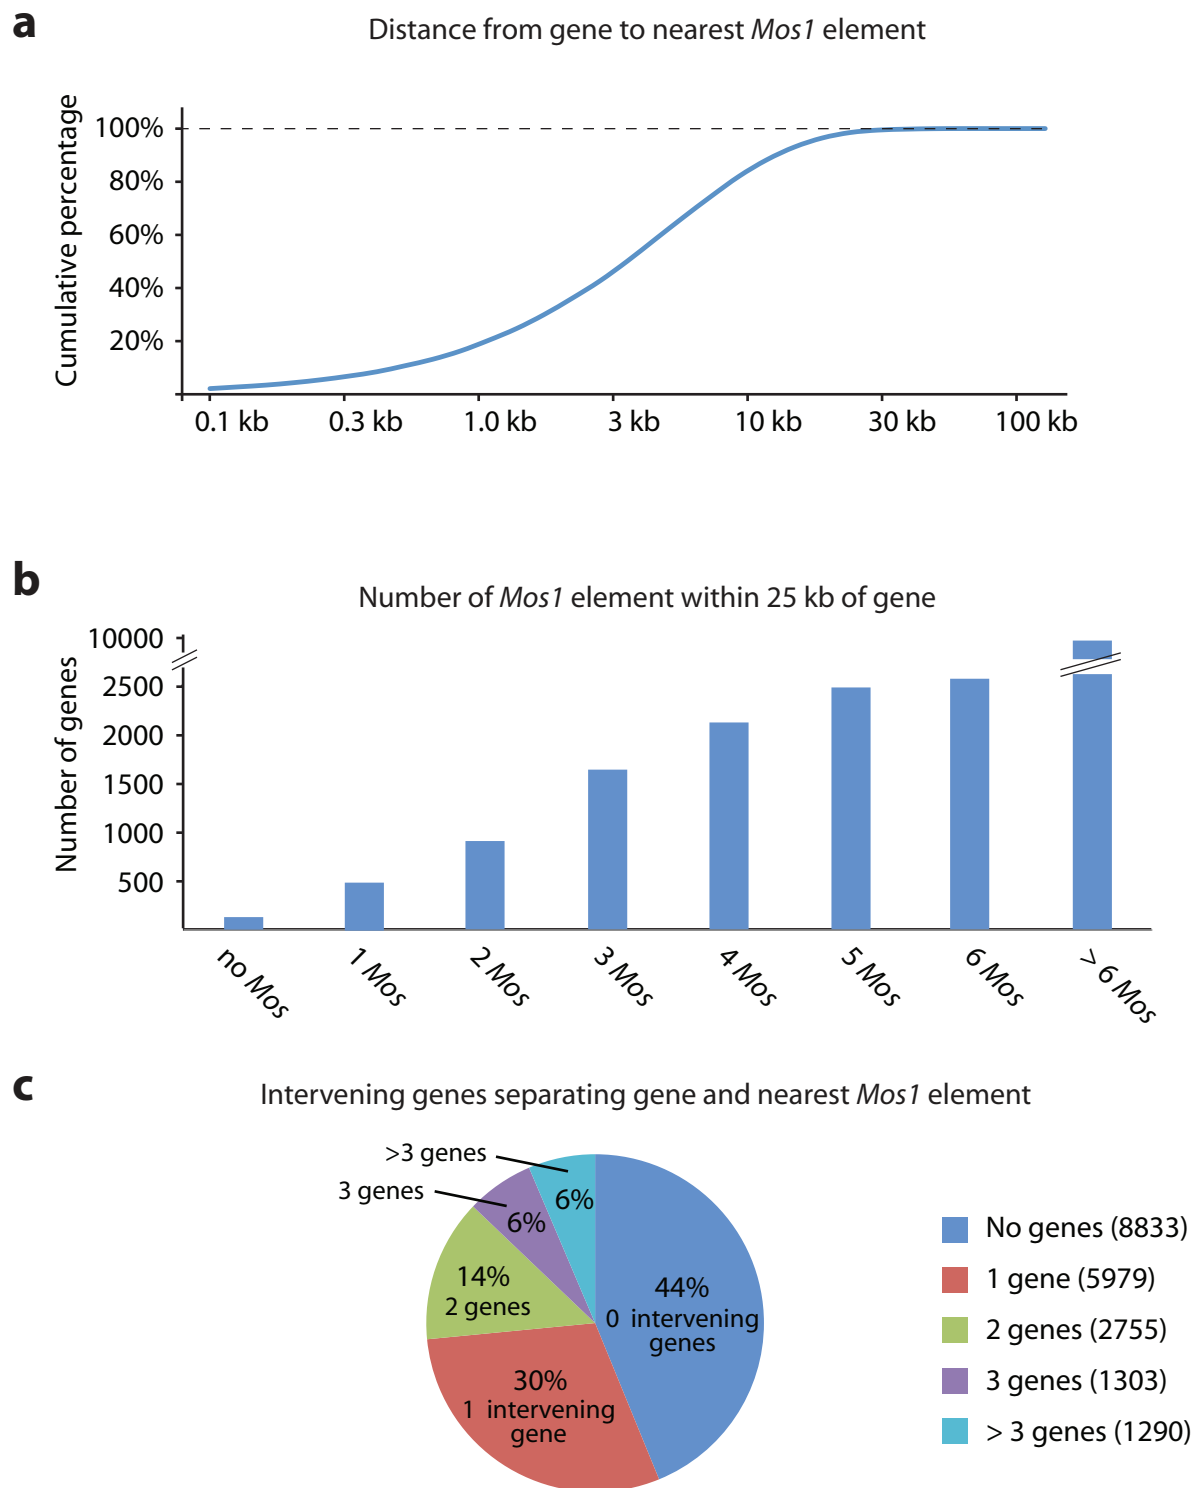

### Supplementary Figure 2: *Mos1* distribution in the genome.

We analyzed the distribution of *Mos1* elements in the *C.elegans* genome (WS205) with a total of 14,305 *Mos1* elements and 20,160 coding genes. See Supp. Table 2 for a comprehensive list of the data. **(a)** Distance from start codon to closest *Mos1* element. Shown is a cumulative plot of the percentage of coding genes within a given distance from the nearest *Mos1* element. 99.4 % of genes are within 25 kb. **(b)** Number of *Mos1* elements within 25 kb. Shown is a histogram of the number of *Mos1* elements within 25 kb of the start codon. The *Mos1* strain collection was frozen as pools of animals and therefore not all inserts can be recovered. The presence of more than one *Mos1* element close to a given gene should minimize the chances of not recovering a *Mos1* allele within 25 kb. **(c)** Intervening genes. Shown is a pie diagram of the number of genes between the closest *Mos1* element and the start codon. Shown in parenthesis to the right are the number of genes for each category. For example, 8833 genes can be deleted without perturbing coding sequence from other genes.

**Supplementary Table 1. Deletion frequency**

| Deletion size                                 | Insert                                        | Displaced ('left') homology size | Worms injected | Stable <i>unc-119(+)</i> inserts | Insertions per injected animal | Complete deletions | Successful deletions per <i>unc-119(+)</i> insertion | Deletions per injected animal      |
|-----------------------------------------------|-----------------------------------------------|----------------------------------|----------------|----------------------------------|--------------------------------|--------------------|------------------------------------------------------|------------------------------------|
| <b><i>cxTi10882</i> locus (<i>dpy-13</i>)</b> |                                               |                                  |                |                                  |                                |                    |                                                      |                                    |
| 2.2 kb                                        | <i>Cb-unc-119(+)</i> and <i>Punc-122::GFP</i> | 1.5 kb                           | 83             | 3                                | 3.6 % (3/83)                   | 3                  | 100% (3/3)                                           | <b>3.6 %</b> (3/83)                |
| 5.5 kb                                        | <i>Cb-unc-119(+)</i> and <i>Punc-122::GFP</i> | 2.8 kb                           | 66             | 2                                | 3.0 % (2/66)                   | 2                  | 100 % (2/2)                                          | <b>3.0 %</b> (2/66)                |
| 10 kb                                         | <i>Cb-unc-119(+)</i> and <i>Punc-122::GFP</i> | 2.5 kb                           | 108            | 4                                | 3.7 % (4/108)                  | 3                  | 75 % (3/4)                                           | <b>2.8 %</b> (3/108)               |
| 15 kb                                         | <i>Cb-unc-119(+)</i>                          | 3.1 kb                           | 45             | 2                                | 4.4 % (2/45)                   | 1                  | 50 % (1/2)                                           | <b>2.2 %</b> (1/45)                |
| 25 kb                                         | <i>Cb-unc-119(+)</i>                          | 3.2 kb                           | 81             | 7                                | 8.6 % (7/81)                   | 4                  | 57 % (4/7)                                           | <b>4.9 %</b> (4/81)                |
| 35 kb                                         | <i>Cb-unc-119(+)</i>                          | 3.0 kb                           | no data        | 8                                | no data                        | 0                  | 0 % (0/8)                                            | <b>0%</b>                          |
| 50 kb                                         | <i>Cb-unc-119(+)</i>                          | 3.3 kb                           | 162            | 5                                | 3.1 % (5/162)                  | 0                  | 0 % (0/5)                                            | <b>0%</b>                          |
| <b><i>ttTi14024</i> locus (<i>dyn-1</i>)</b>  |                                               |                                  |                |                                  |                                |                    |                                                      |                                    |
| 6.0                                           | <i>Cb-unc-119(+)</i>                          | 2.4 kb                           | 100            | 17                               | 17 % (17/100)                  | 4 of 5 tested      | 80 % (4/5)                                           | <b>8-9 %<sup>s</sup></b> (8-9/100) |

**Supplementary Table 1. Deletion frequency.** Please note that the frequency of deletions from the different injections are not directly comparable. In some cases (2.2 kb, 5.5 kb and 10 kb) a larger fragment was inserted. In other cases, two different experimenters performed injections. In our hands, approximately 70 % of all injected worms give rescued transgenic progeny. All deletion strains were isolated from plates that had a mixed population of fluorescent animals rescued by extra-chromosomal arrays and non-fluorescent animals rescued by stable insertion of *unc-119(+)*. <sup>s</sup> 11 of 17 strains (65 %) could not be homozygosed for the *unc-119(+)* marker as expected from a lethal mutation balanced by the insertion of *unc-119(+)*. 4 of 5 tested strains (80 %) had a full *dyn-1* deletion. We therefore estimate that 8 or 9 of the 11 strains (80 % \* 11 strains = 8.8 strains) were full deletions.

### Supplementary Table 3 - Strains

|                              | Strain  | Genotype                                                                                                                                  |
|------------------------------|---------|-------------------------------------------------------------------------------------------------------------------------------------------|
| <b>Mos1 strains</b>          |         |                                                                                                                                           |
|                              | EG5003  | <i>unc-119(ed3)</i> III; <i>cxTi10882</i> IV                                                                                              |
|                              | EG5817  | <i>unc-119(ed3)</i> III ; <i>ttTi14024</i> X                                                                                              |
|                              | EG5618  | <i>unc-119(ed3)</i> III ; <i>ttTi44501</i> X                                                                                              |
| <b>Deletion strains</b>      |         |                                                                                                                                           |
| <b>cxTi10882 mos1 allele</b> |         |                                                                                                                                           |
| 2.2 kb                       | EG5532  | <i>unc-119(ed3)</i> III ; <i>dpy-13(ox448::cb-unc-119(+)) Punc-122::GFP</i> IV                                                            |
|                              | EG5533  | <i>unc-119(ed3)</i> III ; <i>dpy-13(ox449::cb-unc-119(+)) Punc-122::GFP</i> IV                                                            |
|                              | EG5534  | <i>unc-119(ed3)</i> III ; <i>dpy-13(ox450::cb-unc-119(+)) Punc-122::GFP</i> IV                                                            |
| 5.0 kb                       | EG5637  | <i>unc-119(ed3)</i> III ; <i>dpy-13(ox434::cb-unc-119(+)) Punc-122::GFP</i> IV                                                            |
|                              | EG5638  | <i>unc-119(ed3)</i> III ; <i>dpy-13(ox435[cb-unc-119(+)) Punc-122::GFP])</i> IV                                                           |
| 10 kb                        | EG5620  | <i>unc-119(ed3)</i> III ; <i>oxDf19</i> IV. EG5621: <i>unc-119(ed3)</i> III ; <i>oxDf20</i> IV                                            |
|                              | EG5862  | <i>unc-119(ed3)</i> III ; <i>oxIs562[Punc-122::GFP cb-unc-119(+)]</i> IV                                                                  |
|                              | EG5863  | <i>unc-119(ed3)</i> III ; <i>oxDf21</i> IV                                                                                                |
| 15 kb                        | EG5864  | <i>unc-119(ed3)</i> III ; <i>dpy-13(ox451::cb-unc-119(+))</i>                                                                             |
|                              | EG5865  | <i>unc-119(ed3)</i> III ; <i>oxDf22</i> IV                                                                                                |
| 25 kb                        | EG5810  | <i>unc-119(ed3)</i> III ; <i>oxDf13</i> IV.                                                                                               |
|                              | EG5866  | <i>unc-119(ed3)</i> III ; <i>oxDf23</i> IV                                                                                                |
|                              | EG5867  | <i>unc-119(ed3)</i> III ; <i>oxIs563[cb-unc-119(+)]</i> IV                                                                                |
|                              | EG5858  | <i>unc-119(ed3)</i> III ; <i>oxIs564[cb-unc-119(+)]</i> IV                                                                                |
|                              | EG5811  | <i>unc-119(ed3)</i> III ; <i>oxDf14</i> IV                                                                                                |
|                              | EG5812  | <i>unc-119(ed3)</i> III ; <i>oxDf15</i> IV                                                                                                |
|                              | EG5869  | <i>unc-119(ed3)</i> III ; <i>dpy-13(ox452::cb-unc-119(+))</i> IV                                                                          |
| <b>ttTi14024 mos1 allele</b> |         |                                                                                                                                           |
| dyn-1 deletions              | EG5815  | <i>unc-119(ed3)</i> III ; <i>dyn-1(ox447::cb-unc-119(+))</i> X                                                                            |
|                              | EG5878  | <i>unc-119(ed3)</i> III ; <i>dyn-1(ox456::cb-unc-119(+))</i> X                                                                            |
|                              | EG5879  | <i>unc-119(ed3)</i> III ; <i>dyn-1(ox457::cb-unc-119(+))</i> X                                                                            |
|                              | EG5880  | <i>unc-119(ed3)</i> III ; <i>dyn-1(ox458::cb-unc-119(+))</i> X                                                                            |
|                              | EG5881  | <i>unc-119(ed3)</i> III ; <i>dyn-1(ox459::cb-unc-119(+))</i> X                                                                            |
| dyn-1 rescue strain          | EG6028  | <i>unc-119(ed3)</i> III ; <i>dyn-1(ox447::cb-unc-119(+))</i> X ;<br><i>oxEx1473[pMPD13(dyn-1(+)) unc-119(+)) Punc-122::GFP litmus38i]</i> |
| <b>ttTi44501 mos1 allele</b> |         |                                                                                                                                           |
| cst-1/cst-2 deletions        | MJB1110 | <i>unc-119(ed3)</i> III ; <i>basIs10[cb-unc-119(+)) Punc-122::GFP]</i> X                                                                  |
|                              | MJB1111 | <i>unc-119(ed3)</i> III ; <i>basDf1</i> X                                                                                                 |

### Supplementary Table 3 - Oligos

Uppercase sequences are gene specific; lowercase sequences are Gateway linkers.

| Oligo  | Sequence (5'→3')                                      |
|--------|-------------------------------------------------------|
| oBN1   | ggggacagctttctgtacaaagtggATAGAATCAAGCATGCTCCG         |
| oBN2   | ggggacaactttgtataataaagtggGCCCATAGGTCAGACAAA          |
| oCF125 | GGGTGCCAAATAACCAGCTA                                  |
| oCF168 | CAGGAGAGCAAGGACCAAAG                                  |
| oCF250 | GTTGTCCTGAAAGATGTGGTGA                                |
| oCF400 | CCGAATTCACGAAACAACCTG                                 |
| oCF570 | ggggacaactttgtatagaaaagtggGCGAGGAGGTACCAAAGAT         |
| oCF571 | ggggactgctttttgtacaaactgCTTTCGTCCGTTGACAAGGT          |
| oCF607 | ggggacaactttgtatagaaaagtggTGAATTGTAATACGACTCACTATAGGG |
| oCF608 | ggggactgctttttgtacaaactgCTGCCAAAGTTGAGCGTTTATTCTGA    |
| oCF673 | ggggacaactttgtatagaaaagtggCACGATTGACGGACAATAA         |
| oCF674 | ggggactgctttttgtacaaactgGCACATCCCTTTGCTGTAAAA         |
| oCF677 | ggggacagctttctgtacaaagtggTGCACCAGAGAAACACAAAGA        |
| oCF678 | ggggacaactttgtataataaagtggCCGTAAACAAATAAAATTGTGTGG    |
| oCF681 | ggggacaagtgtgtacaaaaagcaggctTGAGCCAATTTATCCAAGTCC     |
| oCF682 | ggggaccactttgtacaagaagtgggtCAGTTGAAATTGAAAATGAGTTAAAG |
| oCF692 | ATAGACGGGGCCAAATTTTC                                  |
| oCF693 | TGTCAACCATTGGTGCTTGT                                  |
| oCF711 | GGAAGACCTTAAGCCGGTTC                                  |
| oCF712 | AGCGAGAGCCTGAAGAAGTG                                  |
| oCF713 | GAACAGGTAGCCCATTGGAA                                  |
| oCF714 | ATTGGCACGTTTCATTAGCC                                  |
| oCF715 | GTTTTCTTGGTGCTGCGCCTA                                 |
| oCF716 | AAAACGGGGGAAAACCTGACT                                 |
| oCF717 | TTTGGAGCCCATAAAATTGC                                  |
| oCF718 | AATGCAAAACTGCTGTCACG                                  |
| oCF719 | ATGTTGGCGGCTATTCAAAC                                  |
| oCF720 | GTGCAGAAATTTGGGGCTTA                                  |
| oCF721 | GTAGGCGGAGCATAACATCGT                                 |
| oCF722 | TAGAACGCCCTTAACCATGC                                  |
| oCF723 | GGCGATTTGTCGGTACTTTG                                  |
| oCF724 | CTTTCACGGGAATGTCTGGT                                  |
| oCF725 | GCGGATTGGAAGGTCATAAG                                  |
| oCF726 | GGAAACCTTGCTCAAATCCA                                  |
| oCF727 | CAGGCAAGGGAGTGCTTTTA                                  |
| oCF728 | GCGTGGAATCTGTCCAAAAT                                  |
| oCF729 | TCCCCATTTACCAGAGAAC                                   |
| oCF730 | GCCTACTGGGTCAACGACAC                                  |
| oCF731 | TGGGCAGTAGTATGGCAAAA                                  |
| oCF732 | TCAAATTTTCCCGTAGACGA                                  |
| oCF733 | CGCCATAATTGCTTGGCTAC                                  |
| oCF734 | GCCACTTCAAGGGAATTCAG                                  |
| oCF735 | AAGGATGCTGCTTACCTGCT                                  |
| oCF736 | AAGCGGATCGCCTTTAATTT                                  |
| oCF737 | ACAGATTCCACGCTCTCCTG                                  |
| oCF738 | ACGGAACCCCAGGTAATCAT                                  |
| oCF739 | GATCTCCTCGCAAGGCTTCT                                  |
| oCF740 | CTGGAAACGGACCAAACCTTC                                 |

|        |                                                             |
|--------|-------------------------------------------------------------|
| oCF741 | CAGAGATTCCGTGTGCAAGA                                        |
| oCF742 | GGTTTCGGGGGAAAAGAATA                                        |
| oCF743 | TTCACACATAGGCGCTGAAG                                        |
| oCF744 | GTCCCTCCCTCCCTAAACTG                                        |
| oCF745 | TTATTGCCGCACACACCTAA                                        |
| oCF746 | ATTACCGAAACATCGCCAAG                                        |
| oCF747 | GGTGGGAGGCAATTGTAAA                                         |
| oCF748 | ATTCCAGATTGCCGAGTTTG                                        |
| oCF749 | AGTGGTCGATGGAGATTTTCG                                       |
| oCF750 | AATTTCCGGCTTTTTGAGGT                                        |
| oCF751 | TGGGGAGGTTGGAGTAGTTG                                        |
| oCF752 | TTCTCACAGCAGTCCAGGTG                                        |
| oCF753 | TTGCTTGGTGCTTGGTGTTA                                        |
| oCF754 | GCGGCCTTATTTTTGAAAATG                                       |
| oCF755 | TGCCTTCCCTGCTTTTCTAA                                        |
| oCF756 | ATATGAACGTTGGCGAGCTT                                        |
| oCF786 | ggggacaactttgtatagaaaagttgGGCTTCTCTGTCGTTCTTCG              |
| oCF787 | ggggactgctttttgtacaacttgCCATTAACCTGAAAAGACTCTGA             |
|        |                                                             |
| oRL1   | ggggacaactttgtatagaaaagttgTCCACTACCCAAATGTGCCATC            |
| oRL2   | ggggactgctttttgtacaacttgGCTGGCGATGCTGGTTATAGTT              |
| oRL4   | ggggacaactttgtatagaaaagttgGATAAATGTTCCAGCGGCAAGGG           |
| oRL5   | ggggactgctttttgtacaacttgAACAGTTCAGTCCCTGCGTG                |
| oRL12  | ggggacaactttgtatagaaaagttgGGGCTGAAACCATTTCAAGA              |
| oRL13  | ggggactgctttttgtacaacttgGGGATTGTCCGTGCTACACT                |
| oRL14  | ggggacaactttgtatagaaaagttgGAGGTGGTGGCTTGGAATTA              |
| oRL15  | ggggactgctttttgtacaacttgAAGTGCCGAAAACCACTTTG                |
| oRL16  | ggggacaactttgtatagaaaagttgCTGCAATGTTTTGCGGACTA              |
| oRL17  | ggggactgctttttgtacaacttgGGAAAAATGCCAGAGTTCA                 |
|        |                                                             |
| oGH128 | ggggacagcttctgtacaaagtggTTTGTGTTGTGAGTTTCAGGAACTTG          |
| oGH129 | ggggacaactttgtataataaagttgGGGGATGAAGTTTAAAGGTTGAGTAGC       |
| oGH130 | ggggacaactttgtatagaaaagttgCAGTCCAGCTATCCGTCCGTC             |
| oGH131 | ggggactgctttttgtacaacttgGTCGATTAATGATATGAGGAAGAGCATTG       |
| oGH132 | ggggacaactttgtatagaaaagttgCTGCTCCTGGTATCCTTAACCAG           |
| oGH133 | ggggactgctttttgtacaacttgATTTGCAAAAGTTATGTTTTTTTTCTTC        |
| oGH134 | ggggacaagtgtacaaaaagcaggetAAAATCACAAATTTTTTCCTTTCCAG        |
| oGH135 | ggggaccactttgtacaagaagctgggtGGTTTTTCTGTCTTACAAGTCATTAAAGAAG |
| oGH136 | ggggacagcttctgtacaaagtggTTTGTGTTGTGTCGTCCTTGTGATC           |
| oGH137 | ggggacaactttgtataataaagttgCCGTTTTAACTTTATTCCACTTTACG        |
| oGH154 | GTGTTCTAGAACTCAATGGCACAG                                    |
| oGH155 | CTATGGTTTTGGAACACTGGCTAG                                    |
| oGH156 | AAACGACATTCATACTTGACACCTG                                   |

### Supplementary Table 3 - PCR verification

|                                       | <b>Annealing</b>            | <b>Forward Oligo</b> | <b>Reverse Oligo</b> | <b>PCR product size</b> |
|---------------------------------------|-----------------------------|----------------------|----------------------|-------------------------|
| <b>cxTi10882 locus</b><br>(Figure 1c) | 39 kb upstream              | oCF713               | oCF714               | 451 bp                  |
|                                       | 29 kb upstream              | oCF715               | oCF716               | 382 bp                  |
|                                       | 19 kb upstream              | oCF717               | oCF718               | 409 bp                  |
|                                       | 14 kb upstream              | oCF719               | oCF720               | 385 bp                  |
|                                       | 9 kb upstream               | oCF721               | oCF722               | 500 bp                  |
|                                       | 4 kb upstream               | oCF723               | oCF724               | 483 bp                  |
|                                       | 1.3 kb upstream             | oCF168               | oCF250               | 245 bp                  |
|                                       | 0.5 kb downstream (control) | oCF725               | oCF726               | 447 bp                  |
|                                       | 5.7 kb downstream (control) | oCF727               | oCF728               | 312 bp                  |

|                                               |                                               |        |        |        |
|-----------------------------------------------|-----------------------------------------------|--------|--------|--------|
| <b>ttTi44501 (cst-1/cst-2)</b><br>(Figure 2d) | 27.5 kb upstream                              | oCF741 | oCF742 | 263 bp |
|                                               | 24 kb upstream                                | oCF743 | oCF744 | 253 bp |
|                                               | 18 kb upstream                                | oCF745 | oCF746 | 268 bp |
|                                               | 13.0 and 5.5 kb upstream<br>(inverted repeat) | oCF692 | oCF693 | 327 bp |
|                                               | 9.4 kb upstream                               | oCF747 | oCF748 | 105 bp |
|                                               | 4.2 kb upstream                               | oCF749 | oCF750 | 232 bp |
|                                               | 2.2 kb upstream                               | oCF751 | oCF752 | 245 bp |
|                                               | 1.7 kb downstream(control)                    | oCF753 | oCF754 | 272 bp |
|                                               | 5 kb downstream                               | oCF755 | oCF756 | 290 bp |

### Supplementary Table 3 - Plasmids

| Name                       | Forward Oligo | Reverse Oligo | Entry vectors |             | Description                                                                                                                        |
|----------------------------|---------------|---------------|---------------|-------------|------------------------------------------------------------------------------------------------------------------------------------|
|                            |               |               | Template      | DONR vector |                                                                                                                                    |
| Positive selection vectors |               |               |               |             |                                                                                                                                    |
| pCFJ66                     |               |               |               |             | [1-2] Entry vector with <i>C.briggsae-unc-119(+)</i> and <i>Punc-122::GFP</i> . Described in Frøkjær-Jensen <i>et al.</i> , (2008) |
| pRL8                       | oCF681        | oCF682        | pCFJ66        | pDONR221    | [1-2] Entry vector with <i>C.briggsae-unc-119(+)</i>                                                                               |

#### *cxTi10882* locus

|         |        |        |        |             |                        |
|---------|--------|--------|--------|-------------|------------------------|
| pBN03   | oBN1   | oBN2   | N2 DNA | pDONRP2-P3  | Right homology vectors |
| pCFJ215 | oCF570 | oCF571 | N2 DNA | pDONRP4-P1R | 2.2 kb deletion        |
| pRL3    | oRL4   | oRL5   | N2 DNA | pDONRP4-P1R | 5.0 kb deletion        |
| pRL4    | oRL1   | oRL2   | N2 DNA | pDONRP4-P1R | 10 kb deletion         |
| pRL11   | oRL12  | oRL13  | N2 DNA | pDONRP4-P1R | 15 kb deletion         |
| pRL19   | oRL14  | oRL15  | N2 DNA | pDONRP4-P1R | 25 kb deletion         |
| pCFJ281 | oCF786 | oCF787 | N2 DNA | pDONRP4-P1R | 35 kb deletion         |
| pRL12   | oRL16  | oRL17  | N2 DNA | pDONRP4-P1R | 50 kb deletion         |

#### *ttTi44501* locus (*cst-1/cst-2*)

|         |        |        |        |             |                       |
|---------|--------|--------|--------|-------------|-----------------------|
| pCFJ251 | oCF677 | oCF678 | N2 DNA | pDONRP2-P3  | Right homology region |
| pCFJ249 | oCF673 | oCF674 | N2 DNA | pDONRP4-P1R | Left homology region  |

#### *ttTi14024* locus (*dyn-1*)

|                       |        |        |        |             |                                   |
|-----------------------|--------|--------|--------|-------------|-----------------------------------|
| pMPD6                 | oGH128 | oGH129 | N2 DNA | pDONRP2-P3  | Right homology region             |
| pMPD8                 | oGH130 | oGH131 | N2 DNA | pDONRP4-P1R | Left homology region              |
| [4-1] <i>dyn-1(+)</i> | oGH132 | oGH133 | N2 DNA | pDONRP4-P1R | Part rescue fragment <i>dyn-1</i> |
| [1-2] <i>dyn-1(+)</i> | oGH134 | oGH135 | N2 DNA | pDONR221    | Part rescue fragment <i>dyn-1</i> |
| [2-3] <i>dyn-1(+)</i> | oGH136 | oGH137 | N2 DNA | pDONRP2-P3  | Part rescue fragment <i>dyn-1</i> |

#### Expression vectors

| Name                                | [4-1]   | [1-2]  | [2-3] | pDEST     | Description     |
|-------------------------------------|---------|--------|-------|-----------|-----------------|
| <i>cxTi10882</i> targeting plasmids |         |        |       |           |                 |
| pCFJ216                             | pCFJ215 | pCFJ66 | pBN03 | pDEST4-R3 | 2.2 kb deletion |
| pRL5                                | pRL3    | pCFJ66 | pBN03 | pDEST4-R3 | 5.0 kb deletion |
| pRL6                                | pRL4    | pCFJ66 | pBN03 | pDEST4-R3 | 10 kb deletion  |
| pRL13                               | pRL11   | pRL8   | pBN03 | pDEST4-R3 | 15 kb deletion  |
| pCFJ260                             | pRL19   | pRL8   | pBN03 | pDEST4-R3 | 25 kb deletion  |
| pCFJ287                             | pCFJ281 | pRL8   | pBN03 | pDEST4-R3 | 35 kb deletion  |
| pRL14                               | pRL12   | pRL8   | pBN03 | pDEST4-R3 | 50 kb deletion  |

#### *ttTi44501* (*cst-1/cst-2*) targeting plasmids

|         |         |        |         |           |                             |
|---------|---------|--------|---------|-----------|-----------------------------|
| pCFJ255 | pCFJ249 | pCFJ66 | pCFJ251 | pDEST4-R3 | <i>cst-1/cst-2</i> deletion |
|---------|---------|--------|---------|-----------|-----------------------------|

#### *ttTi14024* (*dyn-1*) targeting plasmids

|        |                       |                       |                       |           |                             |
|--------|-----------------------|-----------------------|-----------------------|-----------|-----------------------------|
| pGH238 | pMPD6                 | pRL8                  | pMPD8                 | pDEST4-R3 | <i>dyn-1</i> deletion       |
| pMPD13 | [4-1] <i>dyn-1(+)</i> | [1-2] <i>dyn-1(+)</i> | [2-3] <i>dyn-1(-)</i> | pCFJ150   | <i>dyn-1</i> rescue plasmid |
